# Supplementary material for: Exploring Caregivers’ Perceptions on the Impact of Nyaope and Alcohol Use on Tuberculosis Treatment Adherence in Limpopo Province, South Africa: A Qualitative Investigation
Source: Hindawi journal article supplement (doi:10.1155/2024/4523371), 2024-04-17
Supplement: f1 [file 4523371.f1.docx]

**Table S3: Consolidated criteria for reporting qualitative studies (COREQ): 32-item checklist**(**Tong, Sainsbury, and Craig, 2007).**

| **No Item** | **Guide questions/description** | **Reported on**  **Page #** |
| --- | --- | --- |
| **Domain 1: Research team and reflexivity** |  |  |
| **Personal Characteristics** |  |  |
| 1. Interviewer/facilitator | Which author/s conducted the interview or focus group? | Research team on page 4 |
| 2. Credentials | What were the researcher’s credentials? E.g. PhD, MD | Research Team on page 4 |
| 3. Occupation | What was their occupation at the time of the study? | Research team on page 4 |
| 4. Gender | Was the researcher male or female? | N/A |
| 5. Experience and training | What experience or training did the researcher have? | Research team on page 4 |
| **Relationship with participants** |  |  |
| 6. Relationship established | Was a relationship established prior to study commencement? | N/A |
| 7. Participant knowledge of the interviewer | What did the participants know about the researcher? e.g. personal goals, reasons for doing the research | N/A |
| 8. Interviewer characteristics | What characteristics were reported about the interviewer/facilitator? e.g. Bias, assumptions,  reasons and interests in the research topic | Methods on page 8 |
| **Domain 2: study design** |  |  |
| **Theoretical framework** |  |  |
| 9. Methodological orientation andTheory | What methodological orientation was stated to underpin the study? e.g. grounded theory,  discourse analysis, ethnography,phenomenology, content analysis | Methods on page 4 |
| Participant selection |  |  |
| 10. Sampling | How were participants selected? e.g. purposive, convenience, consecutive, snowball | Methods on page 5-6 |
| 11. Method of approach | How were participants approached? e.g. face-to-face, telephone, mail, email | Methods on page 6-7 |
| 12. Sample size | How many participants were in the study? | Methods on page 6 |
| 13. non-participation | How many people refused to participate or dropped out? Reasons? | Methods on page 5 |
| **Setting** |  |  |
| 14. Setting of data collection | Where was the data collected? e.g. home, clinic, workplace | Methods on page 5 |
| 15. Presence of non-participants | Was anyone else present besides the participants and researchers? | Methods on page 5 |
| 16. Description of sample | What are the important characteristics of the sample? e.g. demographic data, date | Methods on page 5-6 |
| **Data collection** |  |  |
| 17. Interview guide | Were questions, prompts, guides provided by the authors? Was it pilot tested? | Methods on page 7 |
| 18. Repeat interviews | Were repeat interviews carried out? If yes, how many? | N/A |
| 19. Audio/visual recording | Did the research use audio or visual recording to collect the data? | Methods on page 7 |
| 20. Field notes | Were field notes made during and/or after the interview or focus group? | Methods on page 7 |
| 21. Duration | What was the duration of the interviews or focus group? | Methods on page 6 |
| 22. Data saturation | Was data saturation discussed? | Methods on page 6 |
| 23. Transcripts returned | Were transcripts returned to participants for comment and/or correction? | N/A |
| **Domain 3: analysis and findings** |  |  |
| **Data analysis** |  |  |
| 24. Number of data coders | How many data coders coded the data? | Methods on page 7-8 |
| 25. Description of the coding tree | Did authors provide a description of the coding tree? | Results on page 9 |
| 26. Derivation of themes | Were themes identified in advance or derived from the data? | Results on page 9 |
| 27. Software | What software, if applicable, was used to manage the data? | N/A |
| 28. Participant checking | Did participants provide feedback on the findings? | N/A |
| **Reporting** |  |  |
| 29. Quotations presented | Were participant quotations presented to illustrate the themes / findings? Was each  quotation identified? e.g. participant number | Results on page 10-12 |
| 30. Data and findings consistent | Was there consistency between the data presented and the findings? | Relationship t existing knowledge |
| 31. Clarity of major themes | Were major themes clearly presented in the findings? | Results on page 10 |
| 32. Clarity of minor themes | Is there a description of diverse cases or discussion of minor themes? | Results and Discussion |
