# Supplementary material for: Exploring Caregivers’ Perceptions on the Impact of Nyaope and Alcohol Use on Tuberculosis Treatment Adherence in Limpopo Province, South Africa: A Qualitative Investigation
Source: Hindawi journal article supplement (doi:10.1155/2024/4523371), 2024-04-17
Supplement: f2 [file 4523371.f2.docx]

**Annexture A**

| **CATEGORY** | **CODE** | **DESCRIPTION OF CODES** |
| --- | --- | --- |
| Forgetting treatment | do not take treatment | forget to take treatment because they are drug |
| no time for treatment | forget to take treatment because they spend time at shebeen |
| Memory Challenges and Treatment Adherence | specific memory-related challenges faced by TB patients influenced by nyaope and alcohol use |
| no time to be at home | patients spend time on the street drinking and using drugs |
| Missing Follow-Up | fail to attend scheduled follow-up | do not attend scheduled follow up as most of them are seldom at home |
| do not observe treatment support appointments | DOT support cannot even trace them at their usual spot |
| non-compliance with the recommended medical schedule | they do not comply with any medical appoitments as they are always busy |
| Refusal of Social Support | fear of stigma and Discrimination | patients refuse support as they do not want to be told what to do |
| Privacy Concerns | patients keep their substance abuse life as their own privacy |
| do not disclose status | they do not even disclose their TB status |
|  |  |
| Refusal of Education/Counseling | inadequate knowledge | they do not have adequate understanding of TB and its treatment |
| no time for counselling sessions | they are always on hurry to leave the healthcare facility |
| reluctance to participate in educational sessions | do not want to attend any education session and only come to clinic when they are sick |

**Codes:**

1. **Forgetting Treatment (Code: FT):**
2. **Missing Follow-Up (Code: MFU):**
3. **Refusal of Social Support (Code: RSS):**
4. **Refusal of Education/Counseling (Code: REC):**

**Categories:**

1. **Adherence Challenges (Category: AC):**
   - Encompassing FT and MFU, this category highlights challenges related to treatment adherence. It captures instances where patients face difficulties in following the prescribed treatment plan and attending scheduled medical appointments.
2. **Social Dynamics (Category: SD):**
   - This category includes RSS and reflects the influence of social interactions on TB treatment. It explores how patients' relationships and interactions with their social environment affect their willingness to accept support.
3. **Educational and Counseling Barriers (Category: ECB):**
   - Incorporating REC, this category focuses on barriers related to patient education and counseling. It explores factors contributing to patients' reluctance to participate in educational sessions and counseling, which are integral aspects of TB treatment.

**CodeTree:**

1. **Patients Forgetting to Take Treatment (Code: PT):**
   - 1.1 Subcode: Forgetfulness
   - 1.2 Subcode: Lack of Reminder Systems
   - 1.3 Subcode: Time-related Challenges
2. **Patients Missing Follow-up Visits (Code: MFV):**
   - 2.1 Subcode: Transportation Issues
   - 2.2 Subcode: Lack of Awareness
   - 2.3 Subcode: Scheduling Conflicts
3. **Patients Refusal of Social Support (Code: RSS):**
   - 3.1 Subcode: Stigma and Discrimination
   - 3.2 Subcode: Privacy Concerns
   - 3.3 Subcode: Perceived Self-Reliance
4. **Patients Refusal to Attend Education and Counseling (Code: REC):**
   - 4.1 Subcode: Lack of Interest
   - 4.2 Subcode: Fear or Misconceptions
   - 4.3 Subcode: Language Barriers

**Codebook:**

**Code PT: Patients Forgetting to Take Treatment**

- Definition: Instances where patients fail to adhere to their TB treatment due to forgetfulness.
- Examples:
  - Participant 1 mentioned forgetting medication due to a busy schedule.
  - Participant 2 highlighted challenges for them in remembering to take pills at prescribed times because they are always at the shebeens.

**Code MFV: Patients Missing Follow-up Visits**

- Definition: Situations where patients do not attend scheduled follow-up visits and directly observed treatment support appointments.
- Examples:
  - Subcode 2.1 (forever not at home): Participant 3 expressed difficulties in accessing TB patients to get them to attend follow-up appointments.

**Code RSS: Patients Refusal of Social Support**

- Definition: Instances where patients decline support from family, friends, or the community.
- Examples:
  - Subcode 3.2 (Privacy Concerns): Participant 4 mentioned avoiding social support to maintain privacy as they do not want anyone to know they are sick as they will be told to stop drinking and using drugs.

**Code REC: Patients Refusal to Attend Education and Counseling**

- Definition: Instances where patients decline participation in health education and counseling sessions.
- Examples:
  - Subcode 4.1 (Lack of Interest): Participant 5 expressed disinterest in attending educational sessions as patients are always busy.
