# Supplementary material for: Exploring Caregivers’ Perceptions on the Impact of Nyaope and Alcohol Use on Tuberculosis Treatment Adherence in Limpopo Province, South Africa: A Qualitative Investigation
Source: Hindawi journal article supplement (doi:10.1155/2024/4523371), 2024-04-17
Supplement: f3 [file 4523371.f3.docx]

Table S2: Themes and sub-themes for the influence of nyaope and alcohol use on TB patients.

| **Themes** | **Sub-theme** |
| --- | --- |
| 1. Challenges in Treatment Adherence | 1.1 Forgetfulness due to Substance Use  1.2 Monitoring Difficulties |
| 2. Disruption of Follow-Up and DOT Support Systems | 2.1 Missed Follow-up Visits and DOT Appointments  2.2 Fear of Stigma and Disclosure Avoidance |
| 3.Reluctance Towards Social Support | 3.1 Refusal of Social Support |
| 4.Resistance to Health Educational and Counselling Interventions | 4.1 Non-Attendance at Health Education and Counselling Sessions |
