# Supplementary material for: Exploring Caregivers’ Perceptions on the Impact of Nyaope and Alcohol Use on Tuberculosis Treatment Adherence in Limpopo Province, South Africa: A Qualitative Investigation
Source: Hindawi journal article supplement (doi:10.1155/2024/4523371), 2024-04-17
Supplement: f4 [file 4523371.f4.docx]

stop taking treatment

forgetfulness

# negative impact of substance abuse on treatment

Poor provider patient communication

# Non-adherence among subastance users

No time for treatment

Not available

spend time at the sheens

disclosure avoidance

Challenge in treatment adherence

Poor engagement

Monitoring challenges

Disruption of follow up and DOT

miss follow up visits

Substance abuse

resistance to health educational and counselling

Non-adherence at health education

Refuse counselling

Reluctant towards social support

Fear of stigma

No reminder system

Miss DOT appointments

move around

do not want to queue

Refuse social support

refuse to be repriminded

always intoxicated

always in a hurry

complain on time

do not attend clinic visists

only attend clinic visits when they feel sick
